# Supplementary material for: Absolute quantum yield for understanding upconversion and downshift luminescence in PbF2:Er3+,Yb3+ crystals
Source: Royal Society of Chemistry journal article supplement (doi:10.1039/d3cp00936j), 2023-01-01
Supplement: d3cp00936j1.pdf [file d3cp00936j1.pdf]

## Absolute Quantum Yield for Understanding the Upconversion and Downshift Properties of Luminescent $\text{PbF}_2:\text{Er}^{3+}, \text{Yb}^{3+}$ Crystals

Eduard Madirov, Dmitry Busko, Ian A. Howard, Bryce S. Richards and Andrey Turshatov

**Table S1.** Integrated absorption cross-section of the  $\text{PbF}_2:\text{Er}^{3+}, \text{Yb}^{3+}$  samples used in the Judd-Ofelt calculations,  $\times 10^{-20} \text{ cm}^2$

|                     | <b>Er1.5Yb1.5</b> | <b>Er2Yb2</b> | <b>Er2Yb3</b> | <b>Er2Yb5</b> | <b>Er2Yb7</b> |
|---------------------|-------------------|---------------|---------------|---------------|---------------|
| $^4\text{G}_{11/2}$ | 5.982             | 6.628         | 6.628         | 6.757         | 7.825         |
| $^2\text{H}_{9/2}$  | 0.620             | 0.877         | 0.853         | 0.789         | 0.988         |
| $^4\text{F}_{7/2}$  | 2.797             | 3.860         | 3.911         | 3.931         | 4.782         |
| $^2\text{H}_{11/2}$ | 6.099             | 6.860         | 6.715         | 6.747         | 8.450         |
| $^4\text{S}_{3/2}$  | 0.972             | 1.649         | 1.361         | 1.293         | 1.727         |
| $^4\text{F}_{9/2}$  | 5.624             | 7.443         | 7.789         | 7.964         | 9.657         |
| $^4\text{I}_{13/2}$ | 34.724            | 41.620        | 42.104        | 44.380        | 54.139        |

**Table S2.** Concentrations of the doping ions based on WDXRF and ions per  $\text{cm}^3$ , unit cell parameters of the  $\text{PbF}_2$  doped with  $\text{Er}^{3+}, \text{Yb}^{3+}$ .

| Sample name       | <b>Er<sup>3+</sup></b> |                                                       | <b>Yb<sup>3+</sup></b> |                                                       | <b>a, Å</b> |
|-------------------|------------------------|-------------------------------------------------------|------------------------|-------------------------------------------------------|-------------|
|                   | <b>mol.,%</b>          | <b>N, <math>\times 10^{20} \text{ cm}^{-3}</math></b> | <b>mol.,%</b>          | <b>N, <math>\times 10^{20} \text{ cm}^{-3}</math></b> |             |
| <b>Er1.5Yb1.5</b> | 1.61                   | 3.34                                                  | 1.436                  | 2.98                                                  | 5.9301      |
| <b>Er2Yb2</b>     | 2.106                  | 4.36                                                  | 2.141                  | 4.44                                                  | 5.9236      |
| <b>Er2Yb3</b>     | 2.186                  | 4.53                                                  | 3.285                  | 6.81                                                  | 5.9174      |
| <b>Er2Yb5</b>     | 2.116                  | 4.38                                                  | 5.142                  | 10.66                                                 | 5.9078      |
| <b>Er2Yb7.5</b>   | 2.116                  | 4.38                                                  | 7.713                  | 15.99                                                 | 5.8887      |

**Table S3.** Predicted radiative lifetimes and branching ratios of some transitions in the Er1.5Yb1.5 sample.

|                                                                    | <b>E1, cm<sup>-1</sup></b> | <b>E2, cm<sup>-1</sup></b> | <b>ΔE, cm<sup>-1</sup></b> | <b>A, s<sup>-1</sup></b> | <b>β</b> | <b>τ<sub>rad</sub>, ms</b> |
|--------------------------------------------------------------------|----------------------------|----------------------------|----------------------------|--------------------------|----------|----------------------------|
| <b><sup>2</sup>H<sub>9/2</sub> – <sup>2</sup>H<sub>11/2</sub></b>  | 24756                      | 19337                      | 5419                       | 18.634                   | 0.0140   | 0.751                      |
| – <b><sup>4</sup>F<sub>9/2</sub></b>                               | 24756                      | 15455                      | 9301                       | 41.471                   | 0.0311   |                            |
| – <b><sup>4</sup>I<sub>11/2</sub></b>                              | 24756                      | 10346                      | 14410                      | 118.013                  | 0.0886   |                            |
| – <b><sup>4</sup>I<sub>13/2</sub></b>                              | 24756                      | 6712                       | 18044                      | 542.343                  | 0.407    |                            |
| – <b><sup>4</sup>I<sub>15/2</sub></b>                              | 24756                      | 217                        | 24539                      | 611.763                  | 0.459    |                            |
| <b><sup>2</sup>H<sub>11/2</sub> – <sup>4</sup>I<sub>13/2</sub></b> | 19337                      | 6712                       | 12625                      | 41.151                   | 0.0282   | 0.686                      |
| – <b><sup>4</sup>I<sub>15/2</sub></b>                              | 19337                      | 217                        | 19120                      | 1416.983                 | 0.972    |                            |
| <b><sup>4</sup>S<sub>3/2</sub> – <sup>4</sup>F<sub>9/2</sub></b>   | 18583                      | 15455                      | 3128                       | 0.3421                   | 3.818E-4 | 1.116                      |
| – <b><sup>4</sup>I<sub>9/2</sub></b>                               | 18583                      | 12597                      | 5986                       | 30.958                   | 0.0345   |                            |
| – <b><sup>4</sup>I<sub>11/2</sub></b>                              | 18583                      | 10346                      | 8237                       | 19.825                   | 0.0221   |                            |
| – <b><sup>4</sup>I<sub>13/2</sub></b>                              | 18583                      | 6712                       | 11871                      | 247.769                  | 0.277    |                            |
| – <b><sup>4</sup>I<sub>15/2</sub></b>                              | 18583                      | 217                        | 18366                      | 597.118                  | 0.666    |                            |
| <b><sup>4</sup>F<sub>9/2</sub> – <sup>4</sup>I<sub>9/2</sub></b>   | 15455                      | 12597                      | 2858                       | 0.726                    | 0.00117  | 1.468                      |
| – <b><sup>4</sup>I<sub>11/2</sub></b>                              | 15455                      | 10346                      | 5109                       | 31.586                   | 0.0464   |                            |
| – <b><sup>4</sup>I<sub>13/2</sub></b>                              | 15455                      | 6712                       | 8743                       | 28.874                   | 0.0424   |                            |
| – <b><sup>4</sup>I<sub>15/2</sub></b>                              | 15455                      | 217                        | 15238                      | 620.141                  | 0.9102   |                            |
| <b><sup>4</sup>I<sub>9/2</sub> – <sup>4</sup>I<sub>11/2</sub></b>  | 12597                      | 10346                      | 2251                       | 3.319                    | 0.0399   | 12.033                     |
| – <b><sup>4</sup>I<sub>13/2</sub></b>                              | 12597                      | 6712                       | 5885                       | 25.395                   | 0.306    |                            |
| – <b><sup>4</sup>I<sub>15/2</sub></b>                              | 12597                      | 217                        | 12380                      | 54.392                   | 0.654    |                            |
| <b><sup>4</sup>I<sub>11/2</sub> – <sup>4</sup>I<sub>13/2</sub></b> | 10346                      | 6712                       | 3634                       | 22.446                   | 0.259    | 11.517                     |
| – <b><sup>4</sup>I<sub>15/2</sub></b>                              | 10346                      | 217                        | 10129                      | 64.383                   | 0.741    |                            |
| <b><sup>4</sup>I<sub>13/2</sub> – <sup>4</sup>I<sub>15/2</sub></b> | 6712                       | 217                        | 6495                       | 103.025                  | 1        | 9.706                      |

**Table S4.** Predicted radiative lifetimes and branching ratios of some transitions in the Er2Yb2 sample.

|                                                                    | <b>E1, cm<sup>-1</sup></b> | <b>E2, cm<sup>-1</sup></b> | <b>ΔE, cm<sup>-1</sup></b> | <b>A, s<sup>-1</sup></b> | <b>β</b> | <b>τ<sub>rad</sub>, ms</b> |
|--------------------------------------------------------------------|----------------------------|----------------------------|----------------------------|--------------------------|----------|----------------------------|
| <b><sup>2</sup>H<sub>9/2</sub> – <sup>2</sup>H<sub>11/2</sub></b>  | 24756                      | 19337                      | 5419                       | 20.613                   | 0.0121   | 0.588                      |
| – <b><sup>4</sup>F<sub>9/2</sub></b>                               | 24756                      | 15455                      | 9301                       | 45.873                   | 0.0270   |                            |
| – <b><sup>4</sup>I<sub>11/2</sub></b>                              | 24756                      | 10346                      | 14410                      | 146.500                  | 0.0862   |                            |
| – <b><sup>4</sup>I<sub>13/2</sub></b>                              | 24756                      | 6712                       | 18044                      | 685.112                  | 0.403    |                            |
| – <b><sup>4</sup>I<sub>15/2</sub></b>                              | 24756                      | 217                        | 24539                      | 801.826                  | 0.471    |                            |
| <b><sup>2</sup>H<sub>11/2</sub> – <sup>4</sup>I<sub>13/2</sub></b> | 19337                      | 6712                       | 12625                      | 51.242                   | 0.0323   | 0.629                      |
| – <b><sup>4</sup>I<sub>15/2</sub></b>                              | 19337                      | 217                        | 19120                      | 1537.217                 | 0.968    |                            |
| <b><sup>4</sup>S<sub>3/2</sub> – <sup>4</sup>F<sub>9/2</sub></b>   | 18583                      | 15455                      | 3128                       | 0.447                    | 3.817E-4 | 0.853                      |
| – <b><sup>4</sup>I<sub>9/2</sub></b>                               | 18583                      | 12597                      | 5986                       | 40.692                   | 0.0347   |                            |
| – <b><sup>4</sup>I<sub>11/2</sub></b>                              | 18583                      | 10346                      | 8237                       | 25.958                   | 0.0221   |                            |
| – <b><sup>4</sup>I<sub>13/2</sub></b>                              | 18583                      | 6712                       | 11871                      | 324.008                  | 0.276    |                            |
| – <b><sup>4</sup>I<sub>15/2</sub></b>                              | 18583                      | 217                        | 18366                      | 780.852                  | 0.666    |                            |
| <b><sup>4</sup>F<sub>9/2</sub> – <sup>4</sup>I<sub>9/2</sub></b>   | 15455                      | 12597                      | 2858                       | 0.726                    | 8.072E-4 | 1.111                      |
| – <b><sup>4</sup>I<sub>11/2</sub></b>                              | 15455                      | 10346                      | 5109                       | 40.562                   | 0.0451   |                            |
| – <b><sup>4</sup>I<sub>13/2</sub></b>                              | 15455                      | 6712                       | 8743                       | 37.706                   | 0.0419   |                            |
| – <b><sup>4</sup>I<sub>15/2</sub></b>                              | 15455                      | 217                        | 15238                      | 820.850                  | 0.912    |                            |
| <b><sup>4</sup>I<sub>9/2</sub> – <sup>4</sup>I<sub>11/2</sub></b>  | 12597                      | 10346                      | 2251                       | 3.457                    | 0.0316   | 9.147                      |
| – <b><sup>4</sup>I<sub>13/2</sub></b>                              | 12597                      | 6712                       | 5885                       | 33.213                   | 0.304    |                            |
| – <b><sup>4</sup>I<sub>15/2</sub></b>                              | 12597                      | 217                        | 12380                      | 72.657                   | 0.665    |                            |
| <b><sup>4</sup>I<sub>11/2</sub> – <sup>4</sup>I<sub>13/2</sub></b> | 10346                      | 6712                       | 3634                       | 25.155                   | 0.234    | 9.305                      |
| – <b><sup>4</sup>I<sub>15/2</sub></b>                              | 10346                      | 217                        | 10129                      | 82.314                   | 0.766    |                            |
| <b><sup>4</sup>I<sub>13/2</sub> – <sup>4</sup>I<sub>15/2</sub></b> | 6712                       | 217                        | 6495                       | 119.264                  | 1        | 8.385                      |

**Table S5.** Predicted radiative lifetimes and branching ratios of some transitions in the Er<sub>2</sub>Yb<sub>3</sub> sample.

|                                                                    | <b>E1, cm<sup>-1</sup></b> | <b>E2, cm<sup>-1</sup></b> | <b>ΔE, cm<sup>-1</sup></b> | <b>A, s<sup>-1</sup></b> | <b>β</b> | <b>τ<sub>rad</sub>, ms</b> |
|--------------------------------------------------------------------|----------------------------|----------------------------|----------------------------|--------------------------|----------|----------------------------|
| <b><sup>2</sup>H<sub>9/2</sub> – <sup>2</sup>H<sub>11/2</sub></b>  | 24756                      | 19337                      | 5419                       | 20.971                   | 0.0121   | 0.561                      |
| – <b><sup>4</sup>F<sub>9/2</sub></b>                               | 24756                      | 15455                      | 9301                       | 46.741                   | 0.0262   |                            |
| – <b><sup>4</sup>I<sub>11/2</sub></b>                              | 24756                      | 10346                      | 14410                      | 152.445                  | 0.0854   |                            |
| – <b><sup>4</sup>I<sub>13/2</sub></b>                              | 24756                      | 6712                       | 18044                      | 717.234                  | 0.402    |                            |
| – <b><sup>4</sup>I<sub>15/2</sub></b>                              | 24756                      | 217                        | 24539                      | 846.532                  | 0.474    |                            |
| <b><sup>2</sup>H<sub>11/2</sub> – <sup>4</sup>I<sub>13/2</sub></b> | 19337                      | 6712                       | 12625                      | 53.226                   | 0.0330   | 0.621                      |
| – <b><sup>4</sup>I<sub>15/2</sub></b>                              | 19337                      | 217                        | 19120                      | 1558.149                 | 0.967    |                            |
| <b><sup>4</sup>S<sub>3/2</sub> – <sup>4</sup>F<sub>9/2</sub></b>   | 18583                      | 15455                      | 3128                       | 0.473                    | 3.817E-4 | 0.807                      |
| – <b><sup>4</sup>I<sub>9/2</sub></b>                               | 18583                      | 12597                      | 5986                       | 42.869                   | 0.0346   |                            |
| – <b><sup>4</sup>I<sub>11/2</sub></b>                              | 18583                      | 10346                      | 8237                       | 27.426                   | 0.0221   |                            |
| – <b><sup>4</sup>I<sub>13/2</sub></b>                              | 18583                      | 6712                       | 11871                      | 342.655                  | 0.277    |                            |
| – <b><sup>4</sup>I<sub>15/2</sub></b>                              | 18583                      | 217                        | 18366                      | 825.792                  | 0.666    |                            |
| <b><sup>4</sup>F<sub>9/2</sub> – <sup>4</sup>I<sub>9/2</sub></b>   | 15455                      | 12597                      | 2858                       | 0.728                    | 7.720E-4 | 1.060                      |
| – <b><sup>4</sup>I<sub>11/2</sub></b>                              | 15455                      | 10346                      | 5109                       | 42.759                   | 0.0453   |                            |
| – <b><sup>4</sup>I<sub>13/2</sub></b>                              | 15455                      | 6712                       | 8743                       | 39.364                   | 0.0417   |                            |
| – <b><sup>4</sup>I<sub>15/2</sub></b>                              | 15455                      | 217                        | 15238                      | 860.269                  | 0.912    |                            |
| <b><sup>4</sup>I<sub>9/2</sub> – <sup>4</sup>I<sub>11/2</sub></b>  | 12597                      | 10346                      | 2251                       | 3.487                    | 0.0305   | 8.754                      |
| – <b><sup>4</sup>I<sub>13/2</sub></b>                              | 12597                      | 6712                       | 5885                       | 35.116                   | 0.307    |                            |
| – <b><sup>4</sup>I<sub>15/2</sub></b>                              | 12597                      | 217                        | 12380                      | 75.630                   | 0.662    |                            |
| <b><sup>4</sup>I<sub>11/2</sub> – <sup>4</sup>I<sub>13/2</sub></b> | 10346                      | 6712                       | 3634                       | 25.785                   | 0.229    | 8.889                      |
| – <b><sup>4</sup>I<sub>15/2</sub></b>                              | 10346                      | 217                        | 10129                      | 86.719                   | 0.771    |                            |
| <b><sup>4</sup>I<sub>13/2</sub> – <sup>4</sup>I<sub>15/2</sub></b> | 6712                       | 217                        | 6495                       | 123.125                  | 1        | 8.122                      |

**Table S6.** Predicted radiative lifetimes and branching ratios of some transitions in the Er2Yb5 sample.

|                                                                    | <b>E1, cm<sup>-1</sup></b> | <b>E2, cm<sup>-1</sup></b> | <b>ΔE, cm<sup>-1</sup></b> | <b>A, s<sup>-1</sup></b> | <b>β</b> | <b>τ<sub>rad</sub>, ms</b> |
|--------------------------------------------------------------------|----------------------------|----------------------------|----------------------------|--------------------------|----------|----------------------------|
| <b><sup>2</sup>H<sub>9/2</sub> – <sup>2</sup>H<sub>11/2</sub></b>  | 24756                      | 19337                      | 5419                       | 21.339                   | 0.012    | 0.562                      |
| – <b><sup>4</sup>F<sub>9/2</sub></b>                               | 24756                      | 15455                      | 9301                       | 46.813                   | 0.0263   |                            |
| – <b><sup>4</sup>I<sub>11/2</sub></b>                              | 24756                      | 10346                      | 14410                      | 154.156                  | 0.0872   |                            |
| – <b><sup>4</sup>I<sub>13/2</sub></b>                              | 24756                      | 6712                       | 18044                      | 716.779                  | 0.402    |                            |
| – <b><sup>4</sup>I<sub>15/2</sub></b>                              | 24756                      | 217                        | 24539                      | 839.599                  | 0.472    |                            |
| <b><sup>2</sup>H<sub>11/2</sub> – <sup>4</sup>I<sub>13/2</sub></b> | 19337                      | 6712                       | 12625                      | 54.359                   | 0.0343   | 0.617                      |
| – <b><sup>4</sup>I<sub>15/2</sub></b>                              | 19337                      | 217                        | 19120                      | 1567.031                 | 0.966    |                            |
| <b><sup>4</sup>S<sub>3/2</sub> – <sup>4</sup>F<sub>9/2</sub></b>   | 18583                      | 15455                      | 3128                       | 0.465                    | 3.816E-4 | 0.820                      |
| – <b><sup>4</sup>I<sub>9/2</sub></b>                               | 18583                      | 12597                      | 5986                       | 42.997                   | 0.0356   |                            |
| – <b><sup>4</sup>I<sub>11/2</sub></b>                              | 18583                      | 10346                      | 8237                       | 27.092                   | 0.0221   |                            |
| – <b><sup>4</sup>I<sub>13/2</sub></b>                              | 18583                      | 6712                       | 11871                      | 336.800                  | 0.276    |                            |
| – <b><sup>4</sup>I<sub>15/2</sub></b>                              | 18583                      | 217                        | 18366                      | 811.681                  | 0.666    |                            |
| <b><sup>4</sup>F<sub>9/2</sub> – <sup>4</sup>I<sub>9/2</sub></b>   | 15455                      | 12597                      | 2858                       | 0.708                    | 7.303E-4 | 1.031                      |
| – <b><sup>4</sup>I<sub>11/2</sub></b>                              | 15455                      | 10346                      | 5109                       | 42.022                   | 0.0432   |                            |
| – <b><sup>4</sup>I<sub>13/2</sub></b>                              | 15455                      | 6712                       | 8743                       | 40.814                   | 0.0428   |                            |
| – <b><sup>4</sup>I<sub>15/2</sub></b>                              | 15455                      | 217                        | 15238                      | 886.471                  | 0.914    |                            |
| <b><sup>4</sup>I<sub>9/2</sub> – <sup>4</sup>I<sub>11/2</sub></b>  | 12597                      | 10346                      | 2251                       | 3.493                    | 0.0291   | 8.424                      |
| – <b><sup>4</sup>I<sub>13/2</sub></b>                              | 12597                      | 6712                       | 5885                       | 34.553                   | 0.291    |                            |
| – <b><sup>4</sup>I<sub>15/2</sub></b>                              | 12597                      | 217                        | 12380                      | 80.655                   | 0.679    |                            |
| <b><sup>4</sup>I<sub>11/2</sub> – <sup>4</sup>I<sub>13/2</sub></b> | 10346                      | 6712                       | 3634                       | 25.712                   | 0.232    | 9.020                      |
| – <b><sup>4</sup>I<sub>15/2</sub></b>                              | 10346                      | 217                        | 10129                      | 85.155                   | 0.768    |                            |
| <b><sup>4</sup>I<sub>13/2</sub> – <sup>4</sup>I<sub>15/2</sub></b> | 6712                       | 217                        | 6495                       | 122.337                  | 1        | 8.174                      |

**Table S7.** Predicted radiative lifetimes and branching ratios of some transitions in the Er2Yb7.5 sample.

|                                                                    | <b>E1, cm<sup>-1</sup></b> | <b>E2, cm<sup>-1</sup></b> | <b>ΔE, cm<sup>-1</sup></b> | <b>A, s<sup>-1</sup></b> | <b>β</b> | <b>τ<sub>rad</sub>, ms</b> |
|--------------------------------------------------------------------|----------------------------|----------------------------|----------------------------|--------------------------|----------|----------------------------|
| <b><sup>2</sup>H<sub>9/2</sub> – <sup>2</sup>H<sub>11/2</sub></b>  | 24756                      | 19337                      | 5419                       | 23.065                   | 0.0106   | 0.445                      |
| – <b><sup>4</sup>F<sub>9/2</sub></b>                               | 24756                      | 15455                      | 9301                       | 59.028                   | 0.0262   |                            |
| – <b><sup>4</sup>I<sub>11/2</sub></b>                              | 24756                      | 10346                      | 14410                      | 190.396                  | 0.0855   |                            |
| – <b><sup>4</sup>I<sub>13/2</sub></b>                              | 24756                      | 6712                       | 18044                      | 903.994                  | 0.402    |                            |
| – <b><sup>4</sup>I<sub>15/2</sub></b>                              | 24756                      | 217                        | 24539                      | 1072.468                 | 0.477    |                            |
| <b><sup>2</sup>H<sub>11/2</sub> – <sup>4</sup>I<sub>13/2</sub></b> | 19337                      | 6712                       | 12625                      | 65.929                   | 0.0327   | 0.493                      |
| – <b><sup>4</sup>I<sub>15/2</sub></b>                              | 19337                      | 217                        | 19120                      | 1962.310                 | 0.967    |                            |
| <b><sup>4</sup>S<sub>3/2</sub> – <sup>4</sup>F<sub>9/2</sub></b>   | 18583                      | 15455                      | 3128                       | 0.603                    | 3.819E-4 | 0.633                      |
| – <b><sup>4</sup>I<sub>9/2</sub></b>                               | 18583                      | 12597                      | 5986                       | 53.822                   | 0.0346   |                            |
| – <b><sup>4</sup>I<sub>11/2</sub></b>                              | 18583                      | 10346                      | 8237                       | 34.857                   | 0.022    |                            |
| – <b><sup>4</sup>I<sub>13/2</sub></b>                              | 18583                      | 6712                       | 11871                      | 437.221                  | 0.277    |                            |
| – <b><sup>4</sup>I<sub>15/2</sub></b>                              | 18583                      | 217                        | 18366                      | 1053.695                 | 0.667    |                            |
| <b><sup>4</sup>F<sub>9/2</sub> – <sup>4</sup>I<sub>9/2</sub></b>   | 15455                      | 12597                      | 2858                       | 0.943                    | 8.138E-4 | 0.862                      |
| – <b><sup>4</sup>I<sub>11/2</sub></b>                              | 15455                      | 10346                      | 5109                       | 54.590                   | 0.0471   |                            |
| – <b><sup>4</sup>I<sub>13/2</sub></b>                              | 15455                      | 6712                       | 8743                       | 48.078                   | 0.0413   |                            |
| – <b><sup>4</sup>I<sub>15/2</sub></b>                              | 15455                      | 217                        | 15238                      | 1055.930                 | 0.910    |                            |
| <b><sup>4</sup>I<sub>9/2</sub> – <sup>4</sup>I<sub>11/2</sub></b>  | 12597                      | 10346                      | 2251                       | 3.638                    | 0.0264   | 7.222                      |
| – <b><sup>4</sup>I<sub>13/2</sub></b>                              | 12597                      | 6712                       | 5885                       | 44.770                   | 0.323    |                            |
| – <b><sup>4</sup>I<sub>15/2</sub></b>                              | 12597                      | 217                        | 12380                      | 90.052                   | 0.650    |                            |
| <b><sup>4</sup>I<sub>11/2</sub> – <sup>4</sup>I<sub>13/2</sub></b> | 10346                      | 6712                       | 3634                       | 29.061                   | 0.207    | 7.150                      |
| – <b><sup>4</sup>I<sub>15/2</sub></b>                              | 10346                      | 217                        | 10129                      | 110.796                  | 0.792    |                            |
| <b><sup>4</sup>I<sub>13/2</sub> – <sup>4</sup>I<sub>15/2</sub></b> | 6712                       | 217                        | 6495                       | 142.934                  | 1        | 6.996                      |

**Table S8.** Decay times obtained after fitting the experimental decays in Figures 3b-3d with single-exponential ( ${}^4I_{13/2}$ - ${}^4I_{15/2}$  and  ${}^4F_{9/2}$ - ${}^4I_{15/2}$  transitions) and bi-exponential ( ${}^4S_{1/2}$ - ${}^4I_{15/2}$  transition) functions.

| ${}^4I_{13/2}$ - ${}^4I_{15/2}$ |  |             |  |  |
|---------------------------------|--|-------------|--|--|
| crystal                         |  | $\tau$ , ms |  |  |
| Er1.5Yb1.5                      |  | 11.0±0.5    |  |  |
| Er2Yb2                          |  | 7.8±0.4     |  |  |
| Er2Yb3                          |  | 8.2±0.4     |  |  |
| Er2Yb5                          |  | 8.8±0.4     |  |  |
| Er2Yb7.5                        |  | 8.9±0.4     |  |  |

  

| ${}^4F_{9/2}$ - ${}^4I_{15/2}$ |             |
|--------------------------------|-------------|
| crystal                        | $\tau$ , ms |
| Er1.5Yb1.5                     | 0.44±0.05   |
| Er2Yb2                         | 0.36±0.04   |
| Er2Yb3                         | 0.38±0.04   |
| Er2Yb5                         | 0.36±0.04   |
| Er2Yb7.5                       | 0.37±0.04   |

  

| ${}^4S_{1/2}$ - ${}^4I_{15/2}$ |               |       |               |       |
|--------------------------------|---------------|-------|---------------|-------|
| crystal                        | $\tau_1$ , ms | $A_1$ | $\tau_2$ , ms | $A_2$ |
| Er1.5Yb1.5                     | 0.18±0.04     | 0.37  | 1.08±0.24     | 0.58  |
| Er2Yb2                         | 0.08±0.02     | 0.94  | 0.94±0.21     | 0.12  |
| Er2Yb3                         | 0.06±0.01     | 1.00  | 0.64±0.14     | 0.08  |
| Er2Yb5                         | 0.05±0.01     | 0.96  | 0.56±0.13     | 0.05  |
| Er2Yb7.5                       | 0.04±0.01     | 1.01  | 0.25±0.06     | 0.03  |

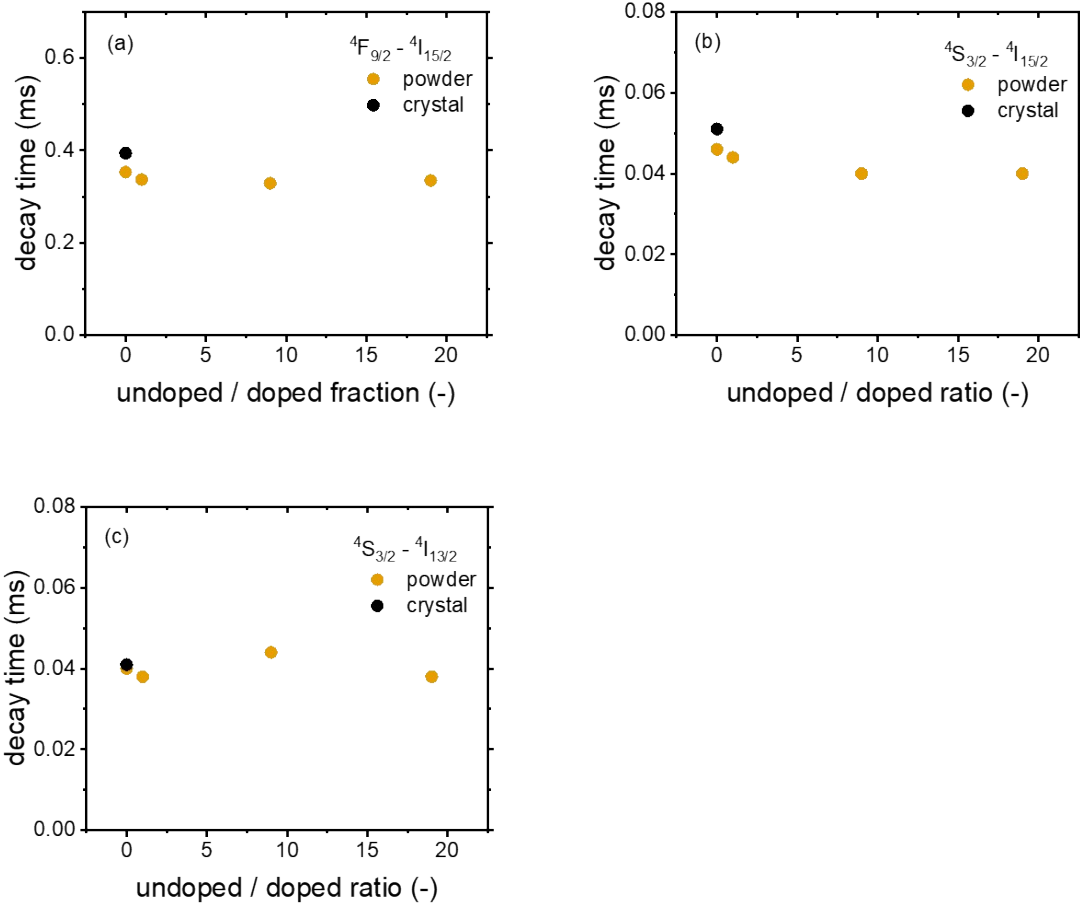

**Figure S1** Luminescence decay times of the  $\text{Er}^{3+}:{}^4S_{3/2} - {}^4I_{15/2}$ ,  $\text{Er}^{3+}:{}^4S_{3/2} - {}^4I_{13/2}$ ,  $\text{Er}^{3+}:{}^4F_{9/2} - {}^4I_{15/2}$  transitions of the  $\text{Er}_2\text{Yb}_5$  crystal and diluted powders.

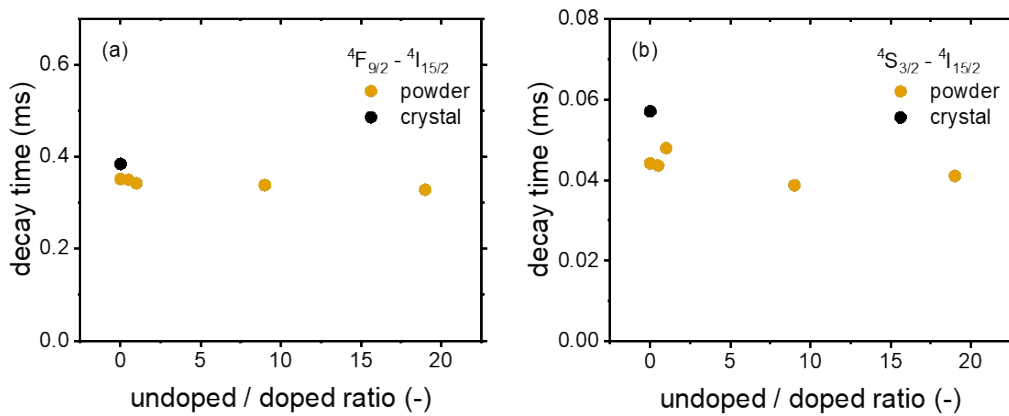

**Figure S2.** Luminescence decay times of the  $\text{Er}^{3+}:{}^4S_{3/2} - {}^4I_{15/2}$  and  $\text{Er}^{3+}:{}^4F_{9/2} - {}^4I_{15/2}$  transitions of the  $\text{Er}_2\text{Yb}_2$  crystal and diluted powders.



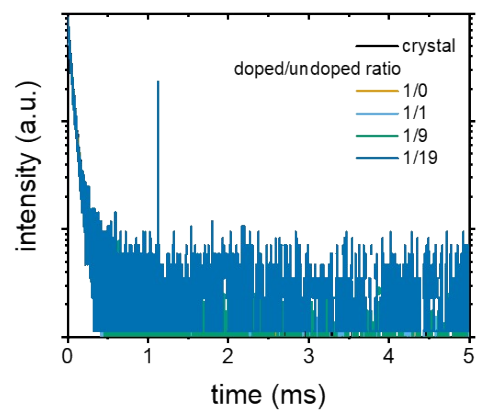

**Figure S3.** Luminescence decay of the  $\text{Er}^{3+}:^4\text{S}_{3/2} - ^4\text{I}_{13/2}$  of the  $\text{Er}_2\text{Yb}_5$  crystal and diluted powders under 522 nm excitation.

**Table S9.** Experimentally obtained  $\phi_{DS}^*$  (%) of some transitions in the  $\text{PbF}_2:\text{Er}^{3+}$ ,  $\text{Yb}^{3+}$  samples upon excitation of the  ${}^4\text{S}_{3/2}$ ,  ${}^4\text{F}_{9/2}$ ,  $\text{Er}^{3+}:{}^4\text{I}_{11/2}$  &  $\text{Yb}^{3+}:{}^2\text{F}_{7/2}$  and  ${}^4\text{I}_{13/2}$  levels as measured in an integrating sphere.

| Excitation                                    | Emission                                                                          | Er1.5Yb1.5 | Er2Yb2 | Er2Yb3 | Er2Yb5 | Er2Yb7.5 |
|-----------------------------------------------|-----------------------------------------------------------------------------------|------------|--------|--------|--------|----------|
| <b>522 nm</b><br><b>0.1 W/cm<sup>2</sup></b>  | ${}^4\text{S}_{3/2} - {}^4\text{I}_{15/2}$                                        | 4.4        | 2.6    | 2.9    | 2.6    | 1.9      |
|                                               | ${}^4\text{S}_{3/2} - {}^4\text{I}_{13/2}$                                        | 2          | 1.2    | 1.5    | 1.3    | 0.9      |
|                                               | ${}^4\text{F}_{9/2} - {}^4\text{I}_{15/2}$                                        | 7          | 6.3    | 5.6    | 3.5    | 1.1      |
|                                               | { $\text{Er}^{3+}:{}^4\text{I}_{11/2}$ &<br>$\text{Yb}^{3+}:{}^2\text{F}_{7/2}$ } | 38.2       | 40     | 43.9   | 36.1   | 30.1     |
| <b>652 nm</b><br><b>0.3 W/cm<sup>2</sup></b>  | ${}^4\text{F}_{9/2} - {}^4\text{I}_{15/2}$                                        | 18.3       | 20.1   | 23.5   | 22     | 16.6     |
|                                               | { $\text{Er}^{3+}:{}^4\text{I}_{11/2}$ &<br>$\text{Yb}^{3+}:{}^2\text{F}_{7/2}$ } | 22.8       | 22.5   | 21.3   | 20.1   | 12.2     |
| <b>940 nm</b><br><b>0.1 W/cm<sup>2</sup></b>  | { $\text{Er}^{3+}:{}^4\text{I}_{11/2}$ &<br>$\text{Yb}^{3+}:{}^2\text{F}_{7/2}$ } | 29.6       | 48.8   | 57.2   | 40.5   | 31.2     |
|                                               | ${}^4\text{I}_{13/2} - {}^4\text{I}_{15/2}$                                       | 3.5        | 3.1    | 3.2    | 2.1    | 1.9      |
| <b>1495 nm</b><br><b>0.1 W/cm<sup>2</sup></b> | ${}^4\text{I}_{13/2} - {}^4\text{I}_{15/2}$                                       | 83.2       | 67.2   | 61.4   | 62.4   | 59.1     |

The correction of the measured  $\phi_{DS}$  values for reabsorption was performed as follows (by analogy with to C. de Mello Donegá et al<sup>1</sup>.): a part of every crystal was ground to powder in a mortar and then the obtained powders were diluted with  $\text{BaSO}_4$  in the ration of 9/1 where the first number is the fraction of  $\text{BaSO}_4$  and the second one is the fraction of  $\text{PbF}_2$  powder. Then spectra of every single crystal and diluted powder were obtained under 378 nm excitation with a spectrofluorometer (FS5, Edinburgh Instruments) in the visible and NIR ranges. The visible emission was normalised to the peak of the  ${}^4\text{S}_{3/2} - {}^4\text{I}_{13/2}$  transition at 850 nm. In the case of NIR emission bands, each band was normalised to the long wavelength edge (1585 nm in the case of  ${}^4\text{I}_{13/2} - {}^4\text{I}_{15/2}$  emission and 1045 nm in the case of { $\text{Er}^{3+}:{}^4\text{I}_{11/2}$  &  $\text{Yb}^{3+}:{}^2\text{F}_{7/2}$ } emission). The corrected  $\phi_{DS}$  values were obtained according to Wilson and Richards<sup>2</sup> as

$$\phi_{DS} = \frac{\phi_{DS}^*}{1 - a + a * \phi_{DS}}$$

Where  $a = 1 - \frac{\int I_{crystal} d\lambda}{\int I_{powder} d\lambda}$ ,  $I_{crystal}$  is the normalized emission intensity of a single crystal sample,  $I_{powder}$  is the normalized emission intensity of a 9/1 diluted powder sample. The integration ranges are 500 – 580 nm for the combination of  ${}^4\text{S}_{3/2} - {}^4\text{I}_{15/2}$  and  ${}^2\text{H}_{11/2} - {}^4\text{I}_{15/2}$  bands, 610 – 705 nm for the  ${}^4\text{F}_{9/2} -$

$^4I_{15/2}$  emission, 920 – 1100 nm for the  $\{\text{Er}^{3+}:^4I_{11/2} \& \text{Yb}^{3+}:^2F_{7/2}\}$  band and 1430 – 1700 nm for the  $^4I_{13/2}$ – $^4I_{15/2}$  emission band.

The spectra that were used for the calculations are presented in **figure S4.1-3**.

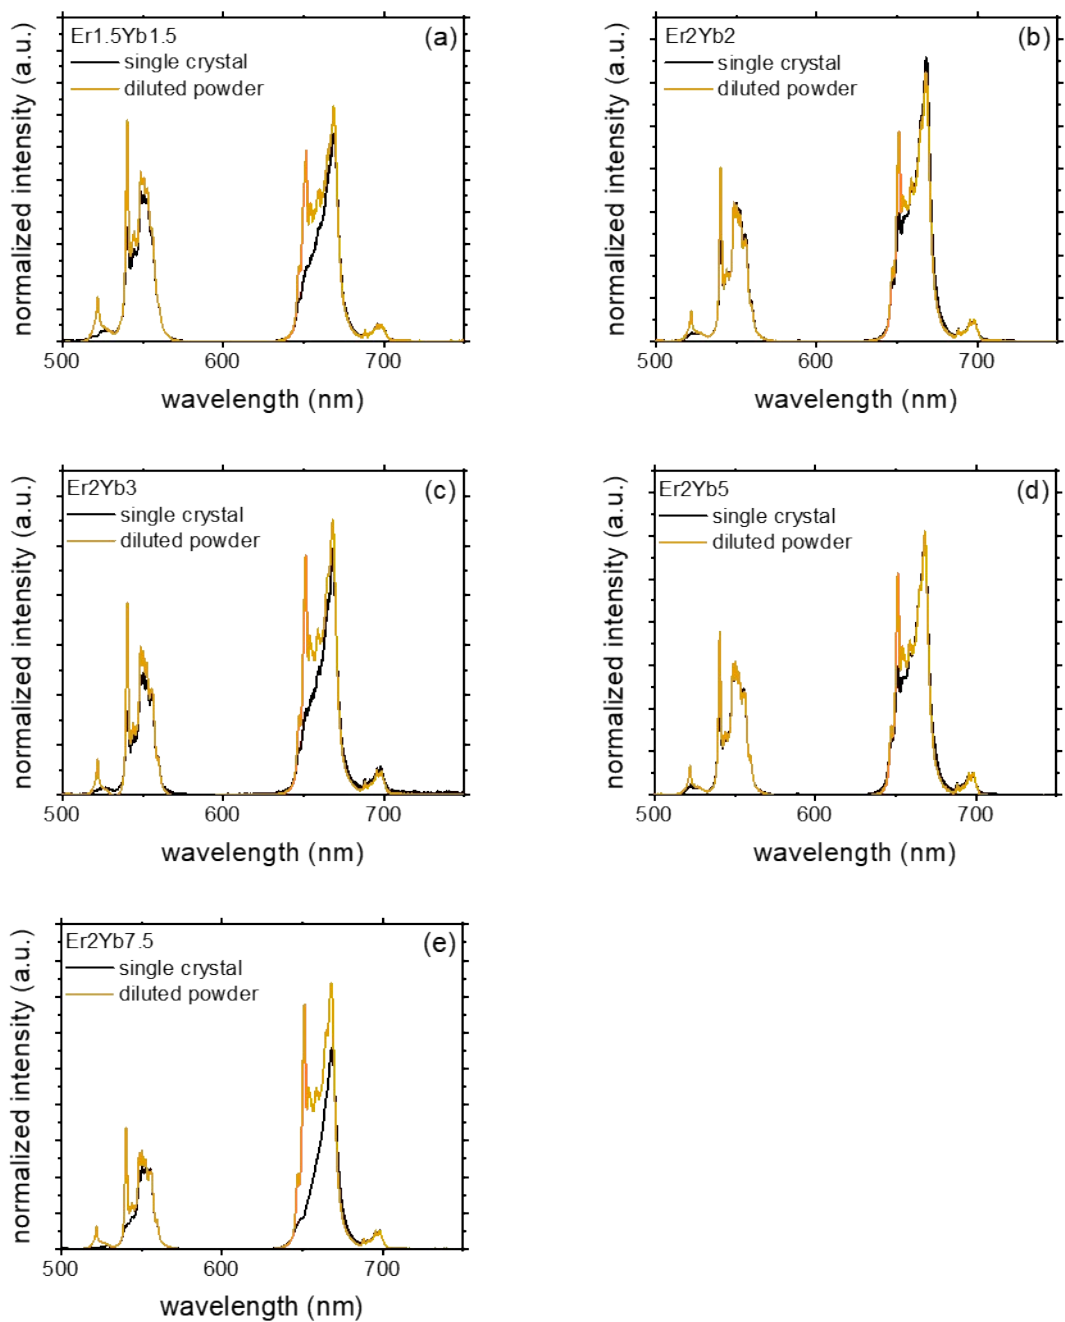

**Figure S4.1.** Visible range emission spectra of the single crystals and 9/1 diluted powders of the  $\text{PbF}_2:\text{Er},\text{Yb}$  samples measured under 378 nm excitation with a spectrofluorometer (FS5, Edinburgh Instruments).

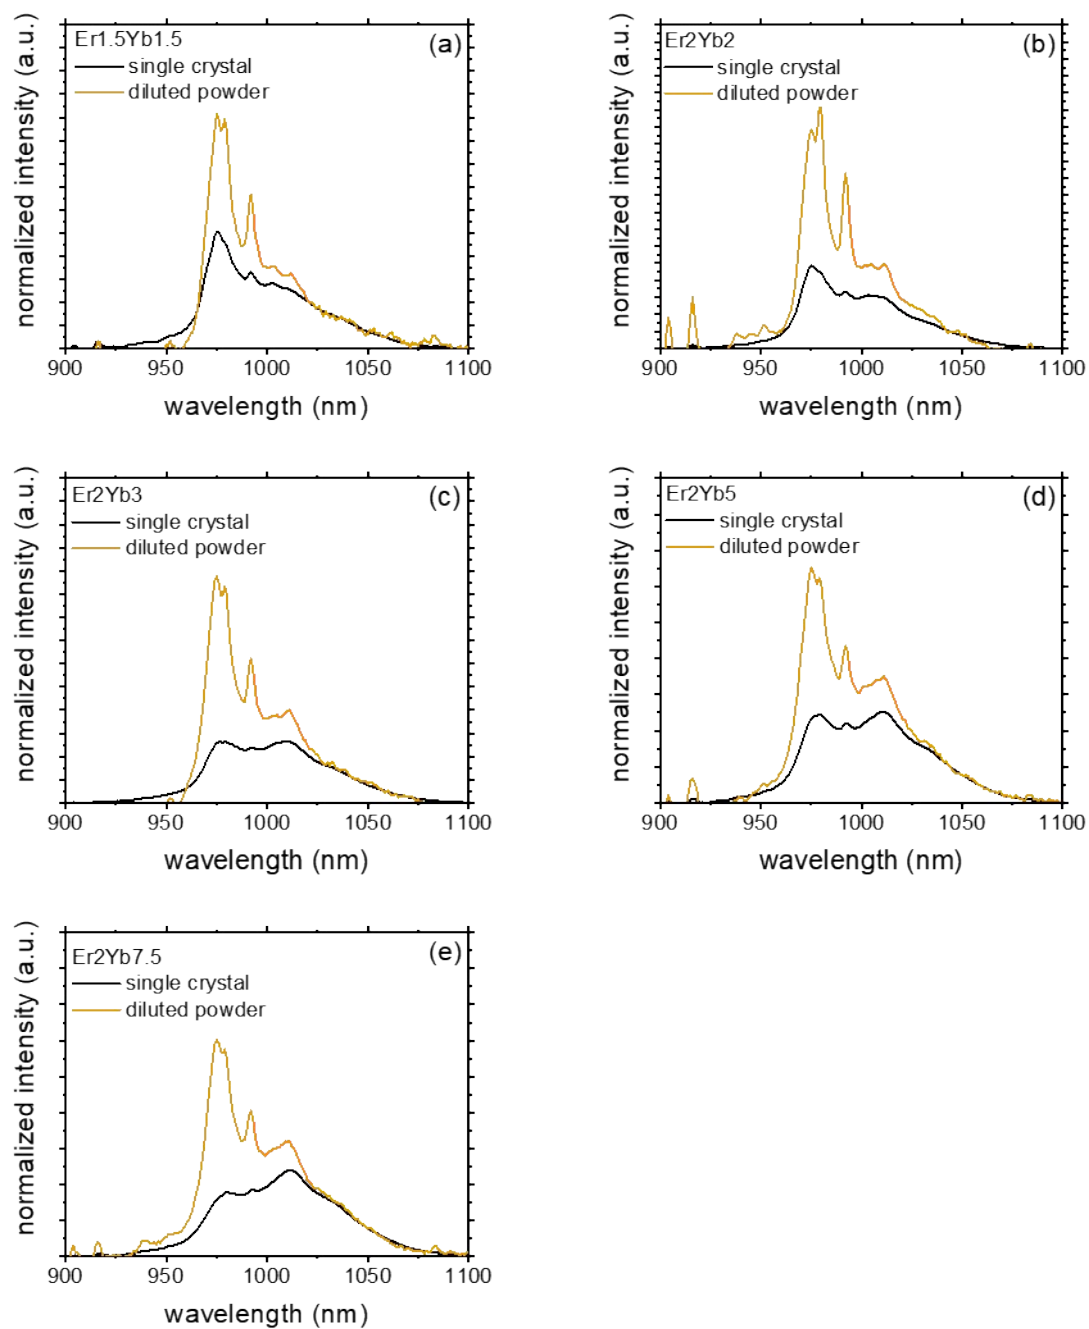

**Figure S4.2.** NIR range emission spectra of the single crystals and 9/1 diluted powders of the  $\text{PbF}_2:\text{Er},\text{Yb}$  samples measured under 378 nm excitation with a spectrofluorometer (FS5, Edinburgh Instruments).

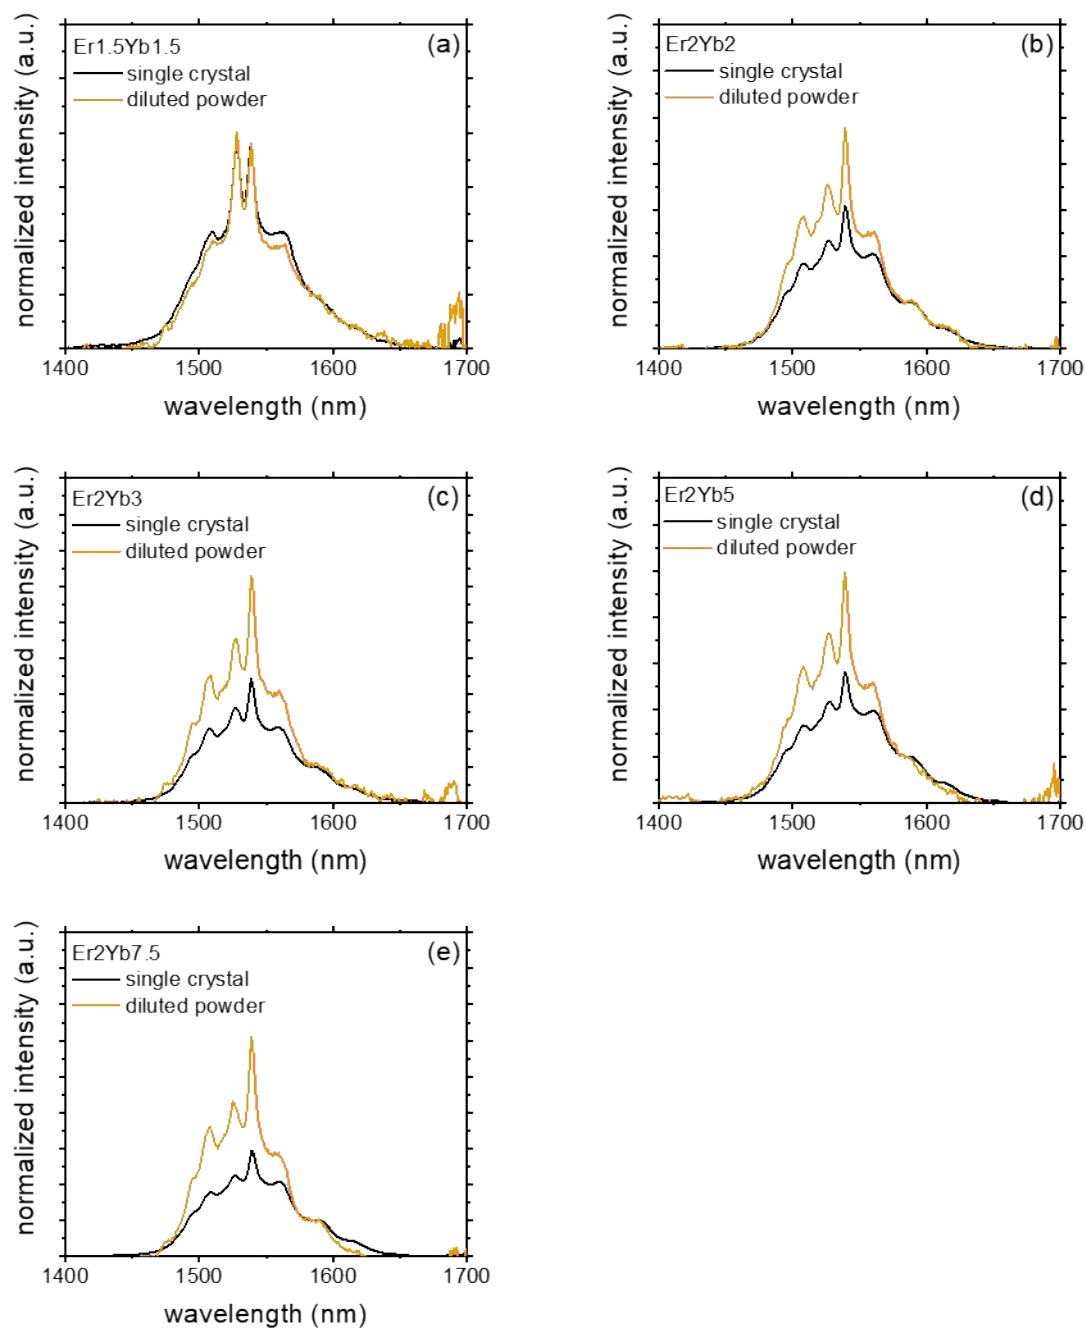

**Figure S4.3.** NIR range emission spectra of the single crystals and 9/1 diluted powders of the  $\text{PbF}_2\text{:Er,Yb}$  samples measured under 378 nm excitation with a spectrofluorometer (FS5, Edinburgh Instruments).

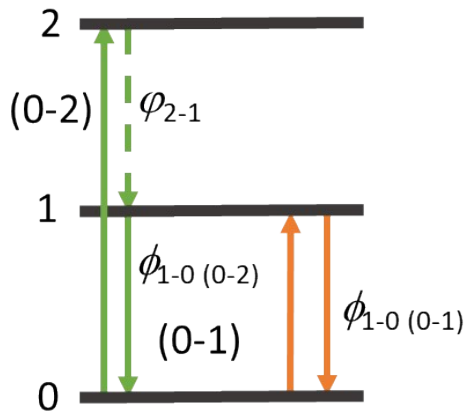

**Figure S5.** Energy transfer diagrams for the case of DS emission, where the ground state **0** is  $\text{Er}^{3+}:^4\text{I}_{15/2}$ , excited state **1** is either  $\text{Er}^{3+}:^4\text{I}_{13/2}$  or  $\text{Er}^{3+}:^4\text{I}_{9/2}$  and excited state **2** is either  $\text{Er}^{3+}:^4\text{I}_{11/2}$  or  $\text{Er}^{3+}:^4\text{S}_{3/2}$

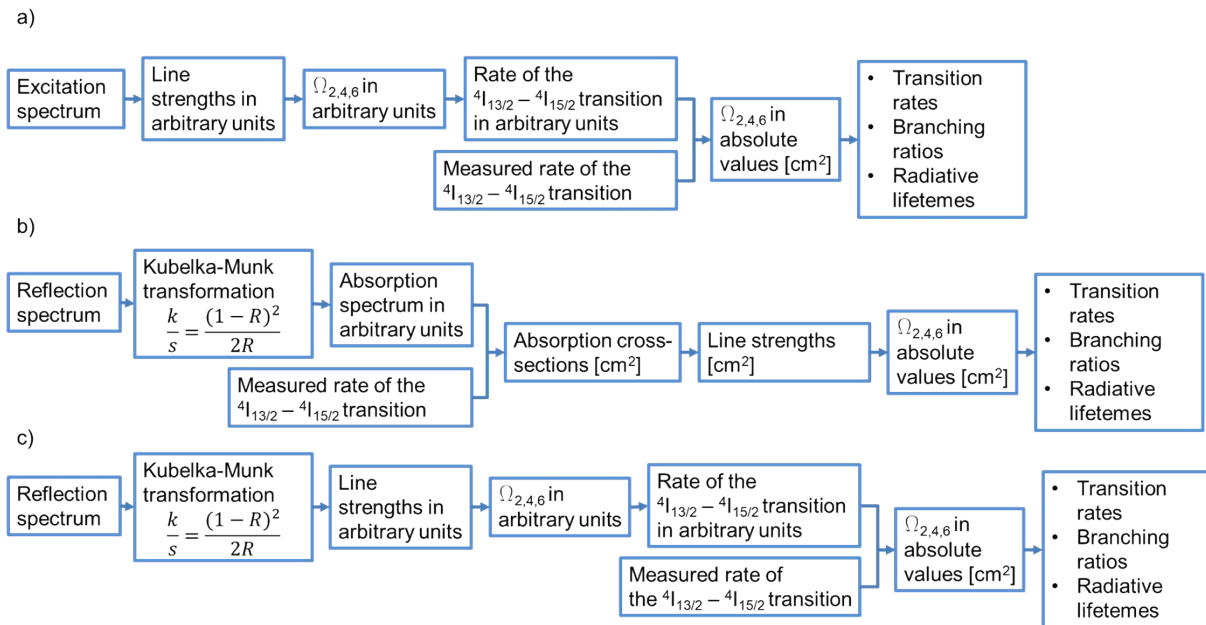

**Figure S6.** Different algorithms of JO calculation in the case of powder samples a) paper <sup>3</sup>; b) paper <sup>4</sup>; c) papers <sup>5,6</sup>

**Table S10.** The comparison of branching ratios of Er<sub>2</sub>Yb<sub>5</sub> powder obtained with different methods.

| Emission<br>band                                                | Lifetime, ms |                              |                              |                                |
|-----------------------------------------------------------------|--------------|------------------------------|------------------------------|--------------------------------|
|                                                                 | Crystal      | <i>Method A</i> <sup>3</sup> | <i>Method B</i> <sup>4</sup> | <i>Method C</i> <sup>5,6</sup> |
| <sup>4</sup> G <sub>9/2</sub> – <sup>4</sup> I <sub>15/2</sub>  | 0.42         | 0.52                         | 0.52                         | 0.42                           |
| <sup>2</sup> H <sub>11/2</sub> – <sup>4</sup> I <sub>15/2</sub> | 0.97         | 0.97                         | 0.97                         | 0.97                           |
| <sup>4</sup> S <sub>3/2</sub> – <sup>4</sup> I <sub>15/2</sub>  | 0.67         | 0.67                         | 0.67                         | 0.66                           |
| <sup>4</sup> F <sub>9/2</sub> – <sup>4</sup> I <sub>15/2</sub>  | 0.91         | 0.88                         | 0.88                         | 0.93                           |
| <sup>4</sup> I <sub>9/2</sub> – <sup>4</sup> I <sub>15/2</sub>  | 0.83         | 0.24                         | 0.22                         | 0.83                           |
| <sup>4</sup> I <sub>11/2</sub> – <sup>4</sup> I <sub>15/2</sub> | 0.73         | 0.89                         | 0.78                         | 0.73                           |
| <sup>4</sup> I <sub>13/2</sub> – <sup>4</sup> I <sub>15/2</sub> | 1            | 1                            | 1                            | 1                              |
| <b>Relative RMS (with 4I<sub>9/2</sub>)</b>                     |              | <b>0.26</b>                  | <b>0.68</b>                  | <b>0.68</b>                    |
| <b>Relative RMS (w/o 4I<sub>9/2</sub>)</b>                      |              | <b>0.12</b>                  | <b>0.19</b>                  | <b>0.11</b>                    |



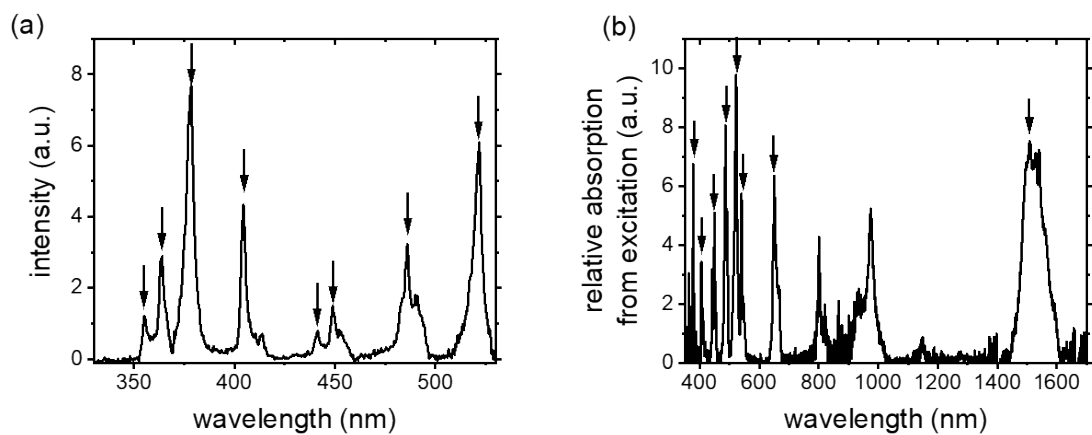

**Figure S7.** a) the excitation spectrum of the  $^4S_{3/2} - ^4I_{15/2}$  transition (detection at 540 nm); b) the reflectance spectrum of the  $\text{Er}_2\text{Yb}_2$  powder sample.

**Table S11.** The comparison of  $\Omega_t$  parameters of Er<sub>2</sub>Yb<sub>2</sub> powder obtained with different methods.

|              | <b>Crystal</b>         | <b>Method A</b> <sup>3</sup> | <b>Method B</b> <sup>4</sup> | <b>Method C</b> <sup>5,6</sup> |
|--------------|------------------------|------------------------------|------------------------------|--------------------------------|
| $\Omega_2$   | 1.34x10 <sup>-20</sup> | 2.73x10 <sup>-20</sup>       | 1.60x10 <sup>-20</sup>       | 1.72x10 <sup>-21</sup>         |
| $\Omega_4$   | 4.70x10 <sup>-21</sup> | 4.43x10 <sup>-20</sup>       | 7.43x10 <sup>-21</sup>       | 7.96x10 <sup>-21</sup>         |
| $\Omega_6$   | 1.79x10 <sup>-20</sup> | 2.23x10 <sup>-20</sup>       | 2.34x10 <sup>-20</sup>       | 2.54x10 <sup>-20</sup>         |
| Relative RMS |                        | 8.50                         | 0.69                         | 0.86                           |

**Table S12.** The comparison of radiative lifetimes of Er<sub>2</sub>Yb<sub>2</sub> powder obtained with different methods.

| <b>Emission band</b>             | <b>Lifetime, ms</b> |                              |                              |                                |
|----------------------------------|---------------------|------------------------------|------------------------------|--------------------------------|
|                                  | <b>Crystal</b>      | <b>Method A</b> <sup>3</sup> | <b>Method B</b> <sup>4</sup> | <b>Method C</b> <sup>5,6</sup> |
| ${}^4G_{9/2} - {}^4I_{15/2}$     | 0.59                | 0.43                         | 0.56                         | 0.52                           |
| ${}^2H_{11/2} - {}^4I_{15/2}$    | 0.61                | 0.35                         | 0.84                         | 0.78                           |
| ${}^4S_{3/2} - {}^4I_{15/2}$     | 0.85                | 0.73                         | 0.69                         | 0.65                           |
| ${}^4F_{9/2} - {}^4I_{15/2}$     | 1.14                | 0.64                         | 1.42                         | 1.32                           |
| ${}^4I_{9/2} - {}^4I_{15/2}$     | 9.47                | 4.93                         | 13.99                        | 12.75                          |
| ${}^4I_{11/2} - {}^4I_{15/2}$    | 9.26                | 8.21                         | 8.83                         | 7.70                           |
| ${}^4I_{13/2} - {}^4I_{15/2}$    | 8.39                | 8.39                         | 12.31                        | 8.39                           |
| <b>Relative RMS (with 4I9/2)</b> |                     | 0.84                         | 0.83                         | 0.57                           |
| <b>Relative RMS (w/o 4I9/2)</b>  |                     | <b>0.69</b>                  | <b>0.68</b>                  | <b>0.45</b>                    |

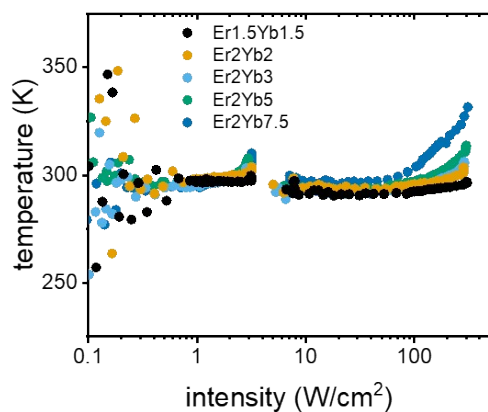

**Figure S8.** Sample temperature as a function of incident 976 nm intensity.

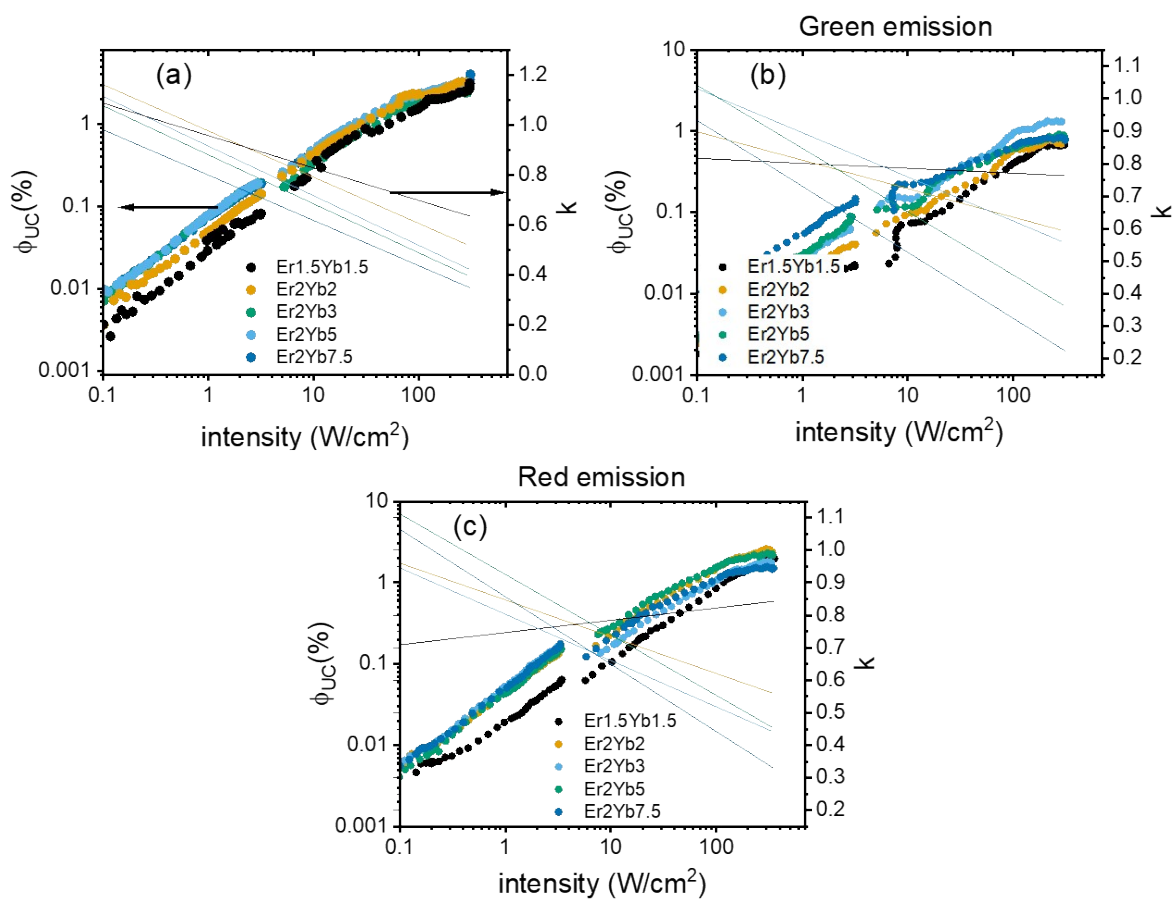

**Figure S9.** Measured  $\phi_{UC}$  and slopes ( $k$ ) of the  $\phi_{UC}$  dependence of a) total UC emission in the 400 – 900 nm range, b) emission of the  ${}^4S_{3/2} - {}^4I_{15/2}$  transition, c) emission of the  ${}^4F_{9/2} - {}^4I_{15/2}$  transition in the intensity range of 0.1 – 350  $W/cm^2$ .

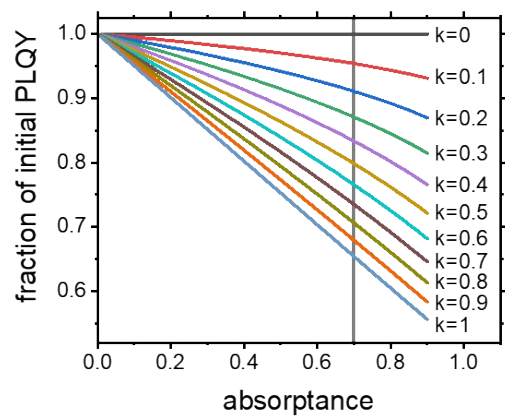

**Figure S10.** Relative change in  $\phi_{UC}$  of a sample versus total absorbance and slope (k) of the  $\phi_{UC}$  intensity dependence.

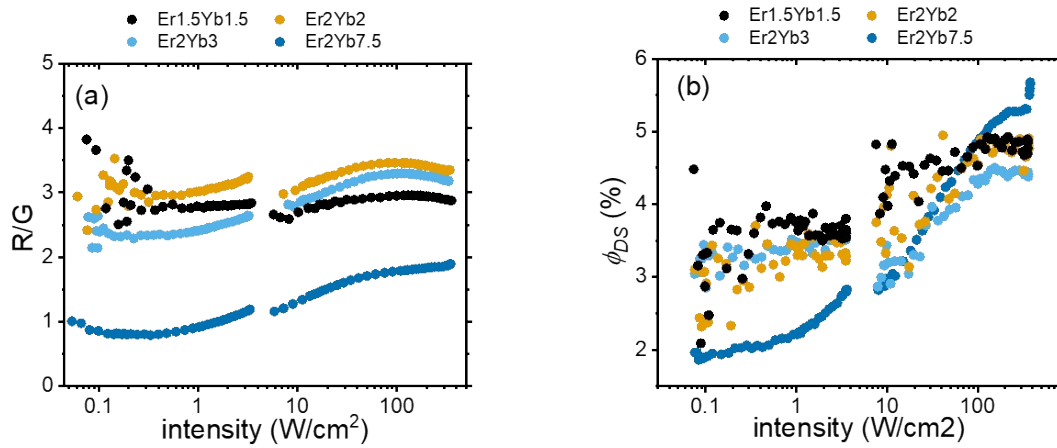

**Figure S11.** (a) Ratio of the intensities of the  ${}^4F_{9/2} - {}^4I_{15/2}$  (Red) transition and the  ${}^4S_{3/2} - {}^4I_{15/2}$  (Green) transition as a function of 976 nm excitation intensity in the 0.1 – 350 W/cm<sup>2</sup>; (b)  $\phi_{DS}$  of the  $Er^{3+}:{}^4I_{13/2} - {}^4I_{15/2}$  transition as a function of intensity at 940 nm excitation.

## References

1. C. de Mello Donegá, A. Meijerink and G. Blasse, *J. Lumin.*, 1994, **62**, 189-201.
2. L. R. Wilson and B. S. Richards, *Appl. Opt.*, 2009, **48**, 212-220.
3. W. Luo, J. Liao, R. Li and X. Chen, *PCCP*, 2010, **12**, 3276-3282.
4. Y. Zhang, B. Chen, S. Xu, X. Li, J. Zhang, J. Sun, X. Zhang, H. Xia and R. Hua, *PCCP*, 2018, **20**, 15876-15883.
5. E. Cantelar, M. Marin-Dobrincic, T. Jardiel, A. C. Caballero and F. Cussó, *Opt. Mater.*, 2015, **41**, 122-125.
6. A. Egaña, M. Tardío, C. de la Torre-Gamarra, A. Várez, E. Cantelar and J. E. Muñoz Santiuste, *J. Lumin.*, 2018, **202**, 232-238.
